# Supplementary material for: An Anthracene Carboxamide-Based Fluorescent Probe for Rapid and Sensitive Detection of Mitochondrial Hypochlorite in Living Cells
Source: MDPI journal article supplement (doi:10.3390/bios13090883), 2023-09-12
Supplement: s1 [file s1]

## Supporting Information

### **An anthracene carboxamide-based fluorescent probe for rapid and sensitive detection of mitochondrial hypochlorite in living cells**

Xueling Liu <sup>1,2</sup>, Yali Wang <sup>2,3</sup>, Guangshuai Zhou <sup>2</sup>, and Wenzhou Zhang <sup>1,\*</sup>

<sup>1</sup>Department of Pharmacy, The Affiliated Cancer Hospital of Zhengzhou University & Henan Cancer Hospital, Zhengzhou 450008, China

<sup>2</sup>School of Pharmaceutical Science and Technology, Health Sciences Platform, Tianjin University, Tianjin 300072, China

<sup>3</sup>Department of Chemistry, College of Pharmacy, North China University of Science and Technology, Tang Shan, 063000, China

\*Correspondence: [zlyyzzhangwenzhou0551@zzu.edu.cn](mailto:zlyyzzhangwenzhou0551@zzu.edu.cn) (W.Z.)

### **Contents**

1. Preparation of reactive oxygen species (ROS) and reactive nitrogen species (RNS)
2. Determination of the detection limit
4. Fluorescence spectra of the probe mito-ACS with and without excessive ClO<sup>-</sup>
5. ESI-MS and HPLC data of mito-ACS and the reaction mixture of mito-ACS with NaOCl
6. pH influence of the probe mito-ACS toward NaOCl.
7. Photostability of probe mito-ACS and the oxidation product toward NaOCl.
9. Cytotoxicity assays
10. NMR spectra

### **1. Preparation of reactive oxygen species (ROS) and reactive nitrogen species (RNS)**

All the stocking solutions of ROS/RNS were prepared based on the reported literature [1]. The stock hydrogen peroxide ( $\text{H}_2\text{O}_2$ ), sodium hypochlorite ( $\text{NaClO}$ ), and tert-butyl hydroperoxide (TBHP) solutions were purchased from Sigma-Aldrich. Superoxide anion ( $\text{O}_2^-$ ) solution was prepared by fully dispersing the potassium dioxide in anhydrous DMSO via ultrasonic treatment. Hydroxyl radicals ( $\cdot\text{OH}$ ) and tert-butoxy radical ( $\text{tBuO}\cdot$ ) were prepared by the Fenton reaction, and the molar ratio of  $\text{FeSO}_4\text{:H}_2\text{O}_2$  and  $\text{FeSO}_4\text{:TBHP}$  was 1:10. Peroxyl radicals ( $\text{ROO}\cdot$ ) were generated from 2,2'-azobis(2-amidinopropane)dihydrochloride. Peroxynitrite ( $\text{ONOO}^-$ ) solution was prepared by 3-morpholiniosydnonimine hydrochloride (SIN-1).  $\text{NO}\cdot$  were diluted from the commercially available 2,2'-azobis (2-amindinopropane) dihydrochloride and sodium nitroferricyanide(III) dihydrate (SNP) to ultrapure water.

## 2. Determination of the detection limit

The detection limit was calculated based on the method reported in the previous literature by the equation as follows:

$$\text{Detection limit} = 3\sigma/k \text{ [2]}$$

where  $\sigma$  is the standard deviation of blank measurement and  $k$  is the slope of the equation between fluorescence intensity and the concentrations of  $\text{NaOCl}$ . We measured the fluorescence intensity of the probe **mito-ACS** without  $\text{NaOCl}$  for six times to obtain the standard deviation, and the slope  $k$  was obtained according to the linear equation of the fluorescence intensity  $F_{575}$  with the increasing concentration of  $\text{NaOCl}$ .

## 3. The synthesis of starting material

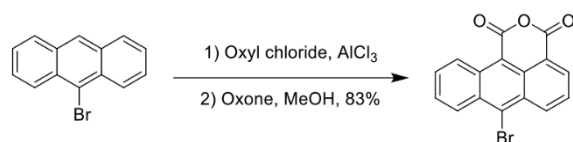

To a  $0^\circ\text{C}$  stirred solution of 9-bromoanthracene (3.25 g, 10 mmol) and oxalyl chloride (4.8 mL) in DCM (50 mL), anhydrous  $\text{AlCl}_3$  (2.13 g) was added. After 2 h, additional DCM (50 mL) and  $\text{AlCl}_3$  (1.6 g) were added, and stirring was continued for another 2 h at  $0^\circ\text{C}$  and then overnight at room temperature. Dilute aqueous  $\text{HCl}$  (2 M) was added and the orange precipitate was collected by filtration, washed with water, and then digested with 100 mL of 5%  $\text{NaOH}$ . The solids were washed with water and dried, further treated with oxone (5.6 g, 20 mmol) in  $\text{MeOH}$  (100 mL), and the mixture was refluxed for 72 h. After cooling, water was added, and the suspension was collected by filtration, washed with water, and dried in air to afford the compound as a brown solid (2.68 g, 83%). The spectroscopic data was in agreement with the data reported in the literature [3].  $^1\text{H}$  NMR (400 MHz,  $\text{CDCl}_3$ ):  $^1\text{H}$  NMR (400 MHz,  $\text{CDCl}_3$ )  $\delta$  9.16 (d,  $J = 8.3$  Hz, 1H), 8.60 (dd,  $J = 22.7, 8.9$  Hz, 2H), 8.04 (d,  $J = 6.7$  Hz, 1H), 7.86 – 7.72 (m, 3H).

#### 4. Fluorescence spectra of the probe **mito-ACS** with and without excessive $\text{ClO}^-$

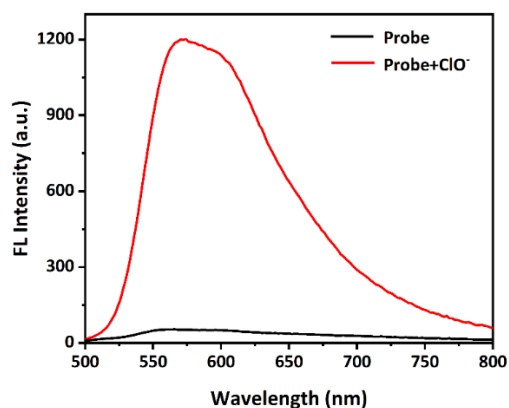

**Figure S1.** Fluorescence spectra of the probe **mito-ACS** (10  $\mu\text{M}$ ) with and without excessive  $\text{ClO}^-$  (30  $\mu\text{M}$ ) in PBS, 10 mM, pH = 7.4,  $\lambda_{\text{exc}}$  = 480 nm, slits = 2/2 nm.

#### 5. ESI-MS and HPLC data of **mito-ACS** and the reaction mixture of **mito-ACS** with $\text{NaOCl}$

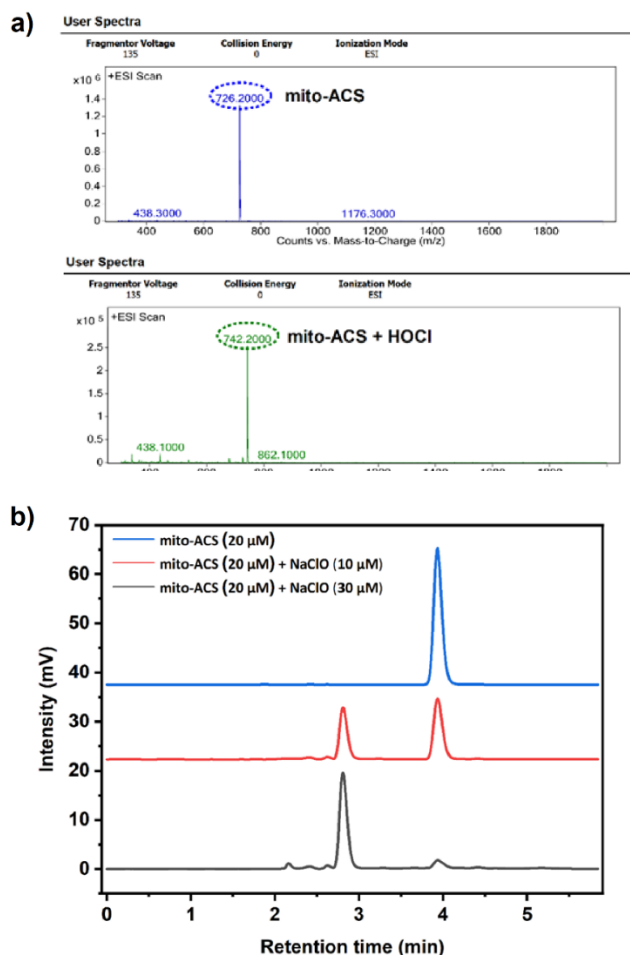

**Figure S2.** (a) MS-ESI spectra of **mito-ACS** and the reaction mixture of **mito-ACS** with  $\text{NaOCl}$ ;

(b) HPLC analysis of 20  $\mu\text{M}$  **mito-ACS** without or with different amounts of  $\text{ClO}^-$  (methanol/water solvent mixture (70 : 30, v/v) as the eluent, monitored at 480 nm.

## 6. pH influence of the probe **mito-ACS** toward **NaOCl**.

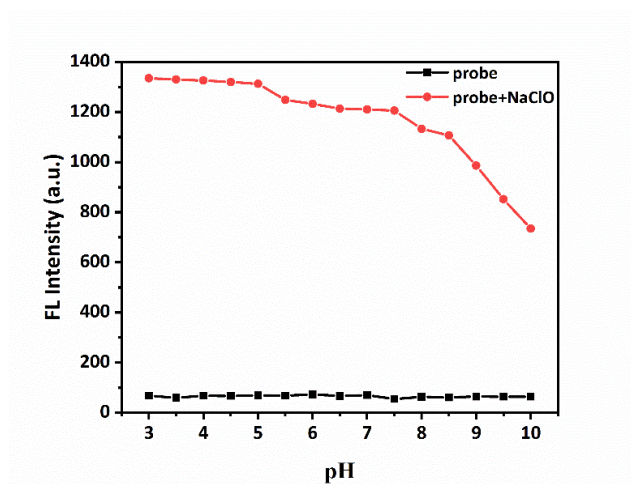

**Figure S3.** Fluorescence response of **mito-ACS** (10  $\mu\text{M}$ ) in the absence and presence of **NaOCl** (30  $\mu\text{M}$ ) at different pH solutions. All data were recorded in different pH buffer solutions (10 mM).  $\lambda_{\text{exc}} = 480$  nm, slits = 2/2 nm.

## 7. Photostability of probe **mito-ACS** and the oxidation product toward **NaOCl**.

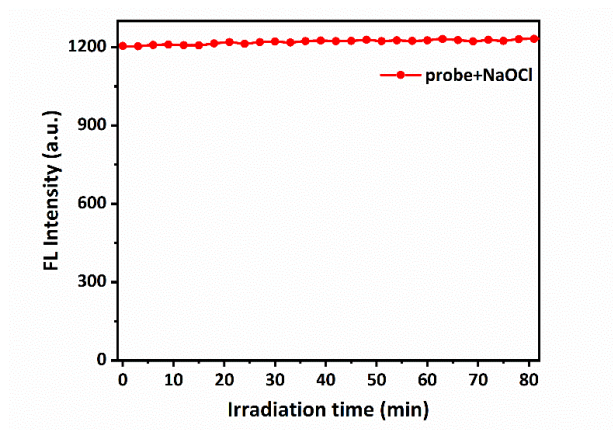

**Figure S4.** Time-dependent fluorescence intensity changes of **mito-ACS** (10  $\mu\text{M}$ ) under the irradiation by a 450w lamp (PBS, 10 mM, pH = 7.4),  $\lambda_{\text{ex}} = 480$  nm, slits = 2/2 nm.

## 8. Reactivity of probe mito-ACS and the oxidation product toward GSH.

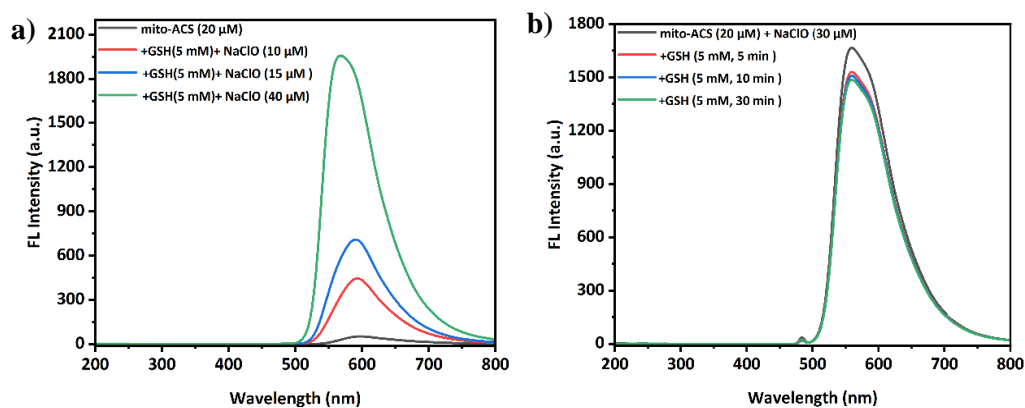

**Figure S5.** (a) Fluorescence spectra response of **mito-ACS** (20  $\mu\text{M}$ ) with GSH (5 mM) in response to different concentrations of  $\text{ClO}^-$  (10  $\mu\text{M}$ , 15  $\mu\text{M}$ , 40  $\mu\text{M}$ ). (b) Fluorescence spectra response of **mito-ACS** (20  $\mu\text{M}$ ) with NaClO (30  $\mu\text{M}$ ) in response to GSH (5 min, 10 min, 30 min).  $\lambda_{\text{exc}} = 480$  nm, slits = 2/2 nm. (PBS, 10 mM, pH = 7.4)

## 9. Cytotoxicity assays

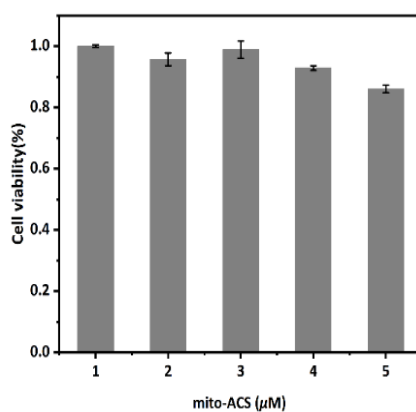

**Figure S6.** Cell viability of HeLa cells treated with different concentrations of **mito-ACS** (0, 5, 10, 15, 20  $\mu\text{M}$ ) for 24 h.

## 10. NMR spectra

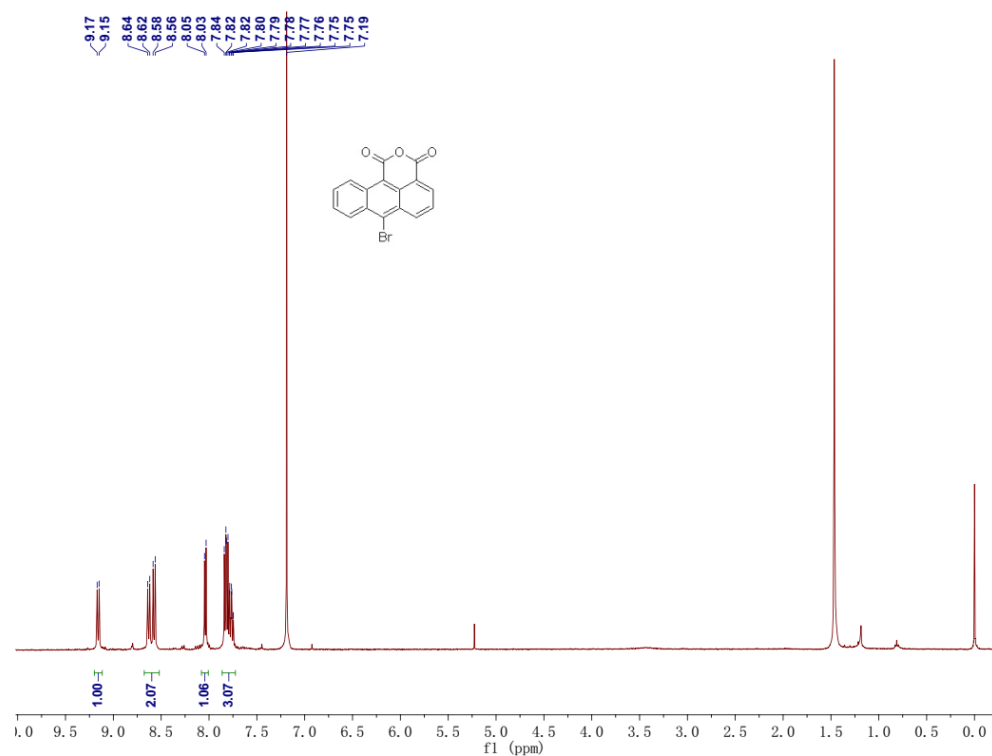

**Figure S7.**  $^1\text{H}$  NMR (400 MHz) spectrum of 6-Bromo-1,2-anthracene dicarboxylic acid anhydride in  $\text{CDCl}_3$ .

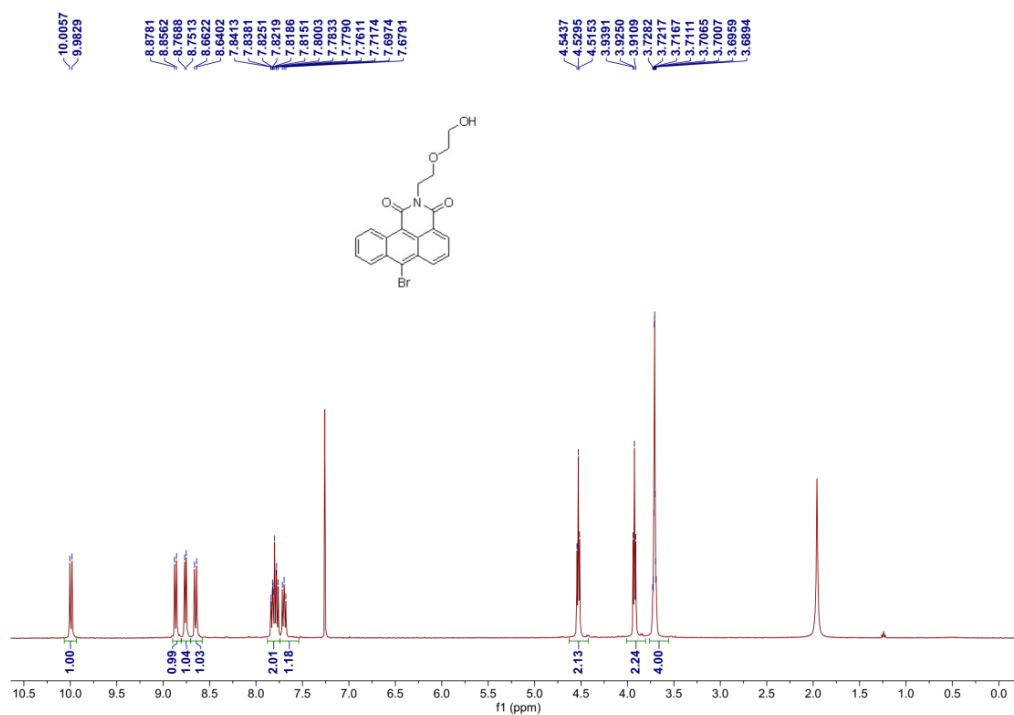

**Figure S8.**  $^1\text{H}$  NMR (400 MHz) spectrum of **1** in  $\text{CDCl}_3$ .

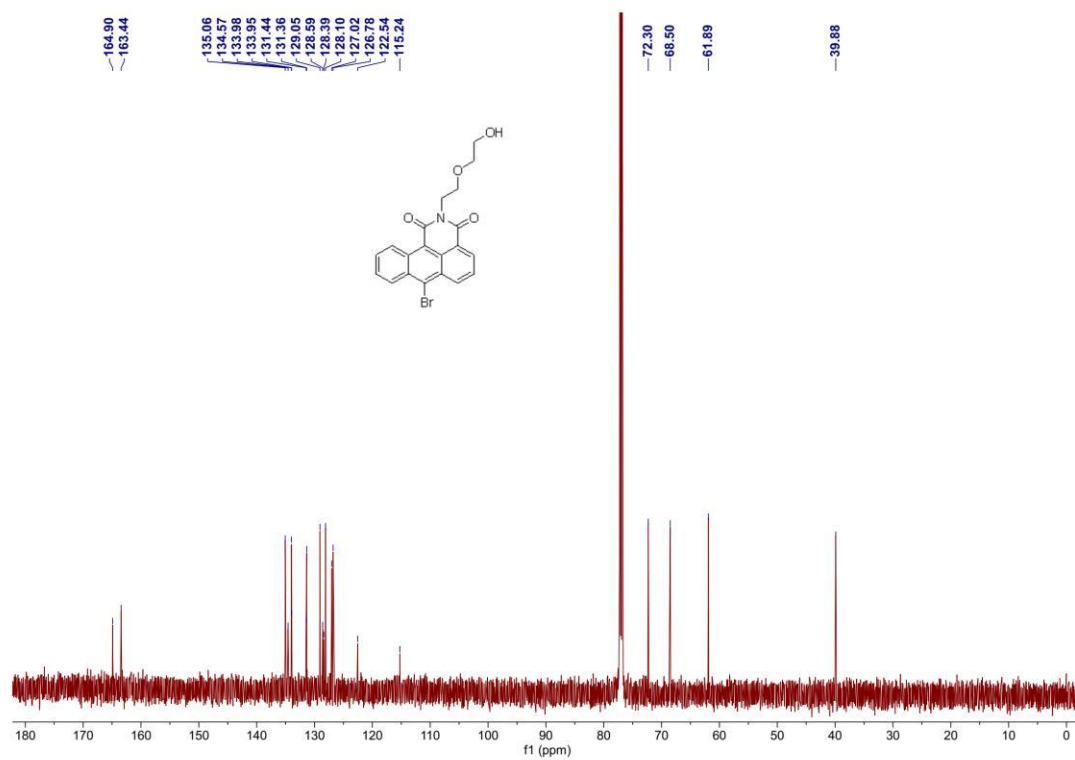

Figure S9. <sup>13</sup>C NMR (151 MHz) spectrum of **1** in CDCl<sub>3</sub>.

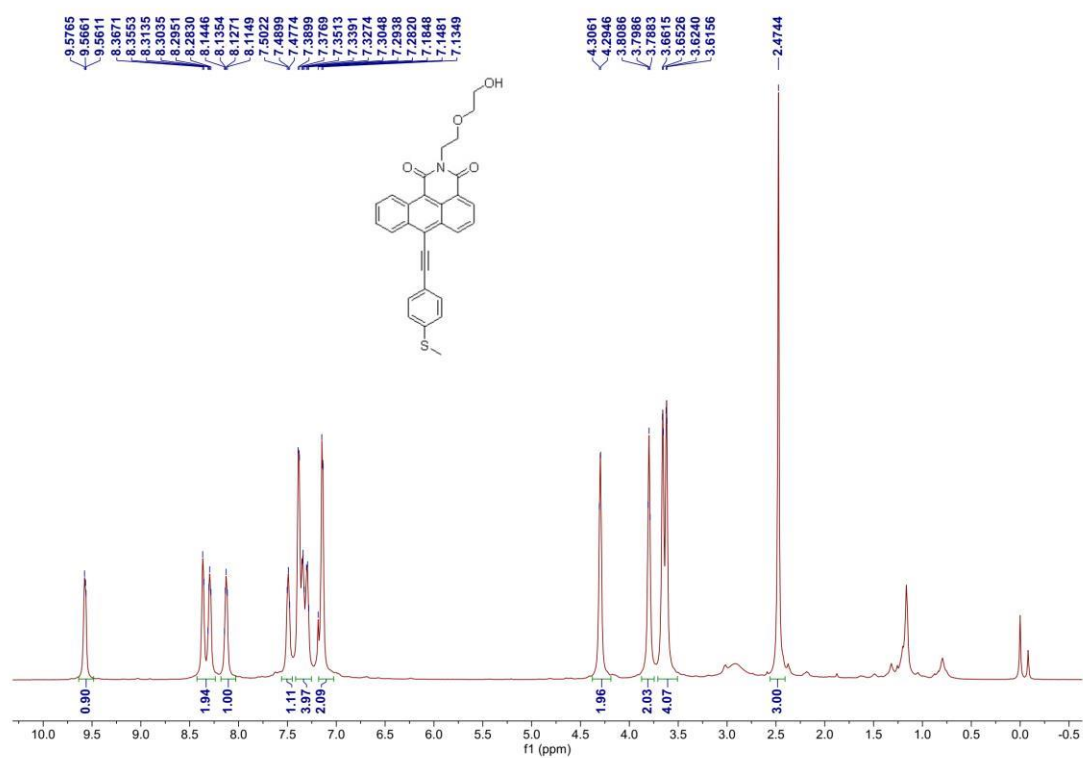

Figure S10. <sup>1</sup>H NMR (600 MHz) spectrum of **2** in CDCl<sub>3</sub>.

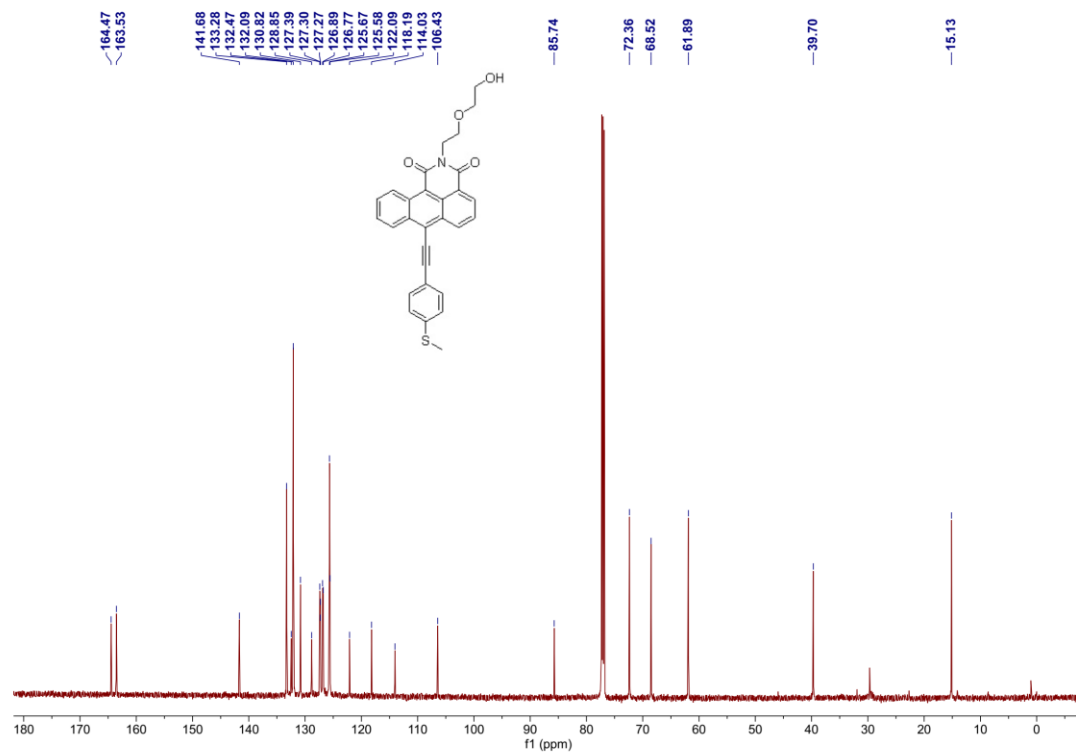

**Figure S11.** <sup>13</sup>C NMR (151 MHz) spectrum of **2** in CDCl<sub>3</sub>.

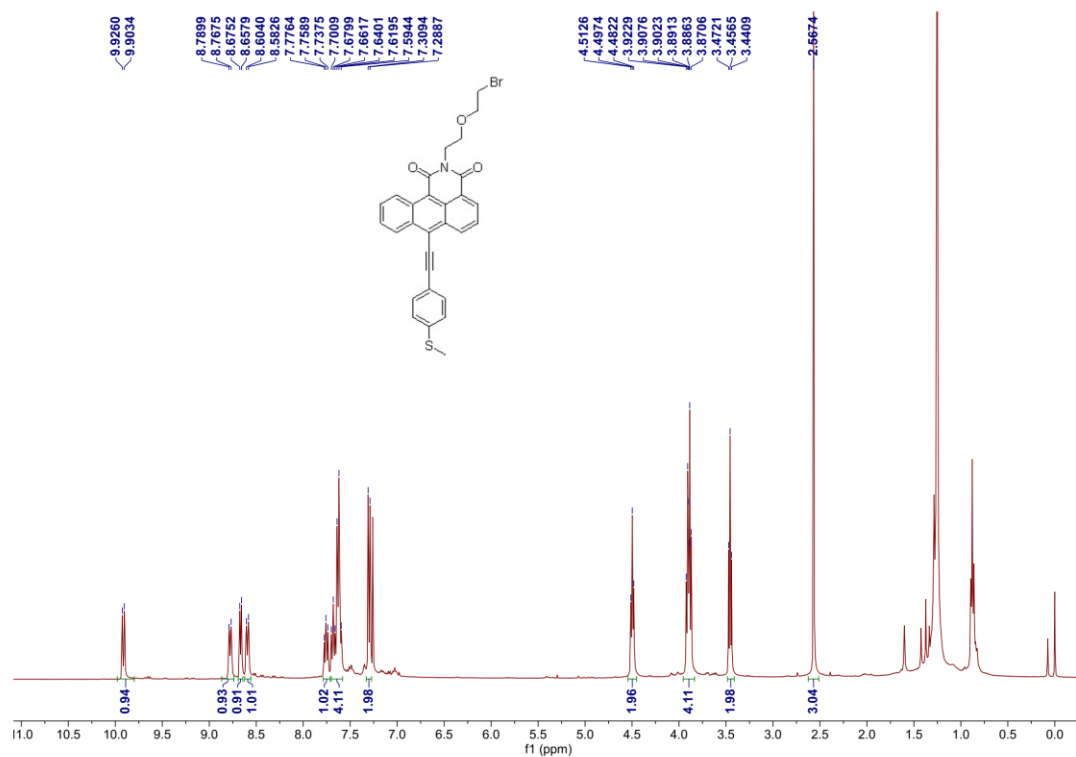

**Figure S12.** <sup>1</sup>H NMR (400 MHz) spectrum of **3** in CDCl<sub>3</sub>.



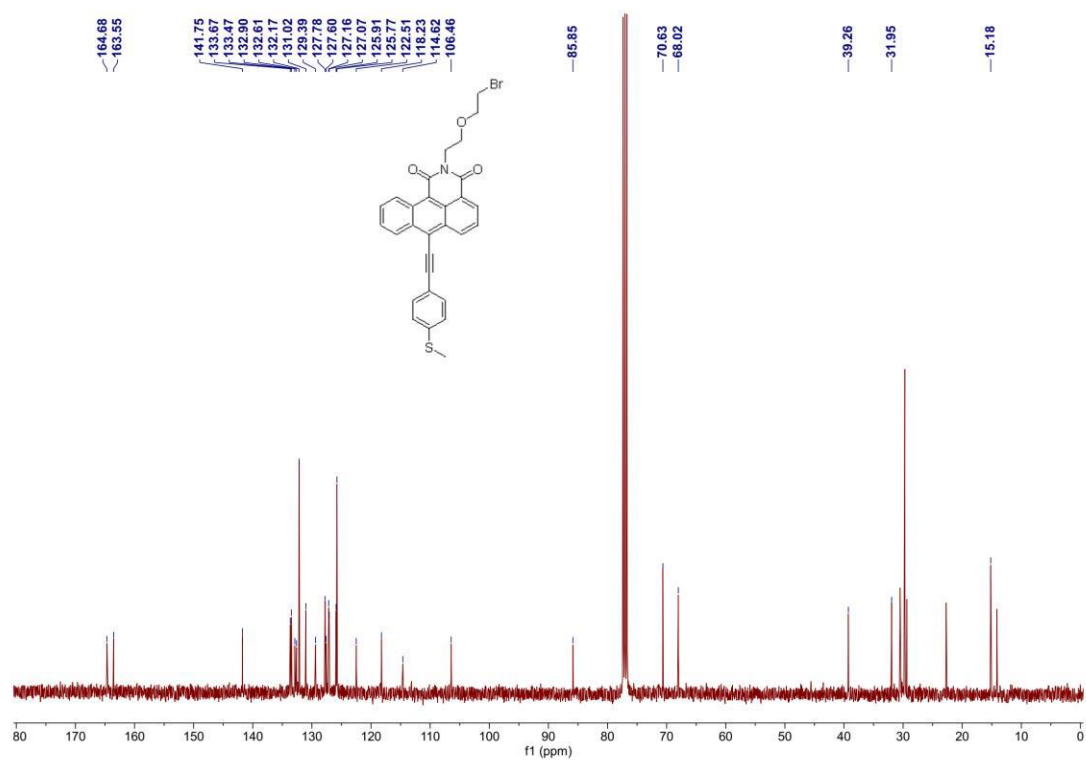

Figure S13. <sup>13</sup>C NMR (101 MHz) spectrum of **3** in CDCl<sub>3</sub>.

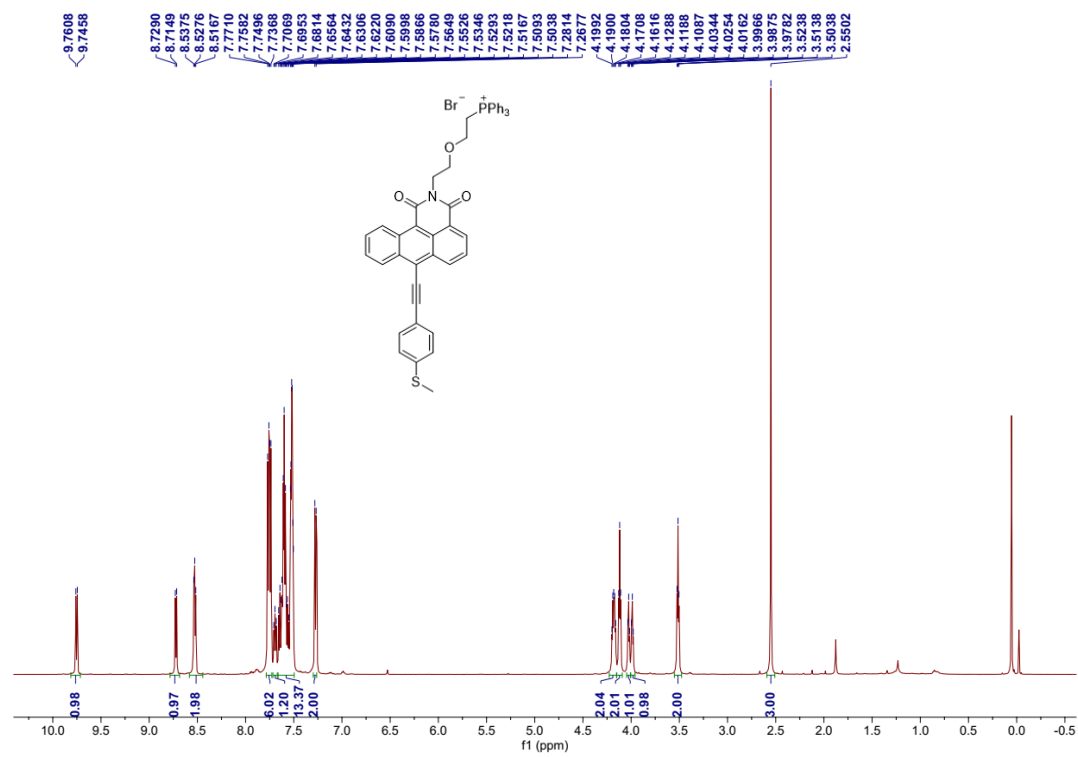

Figure S14. <sup>1</sup>H NMR (400 MHz) spectrum of mito-ACS in CDCl<sub>3</sub>.

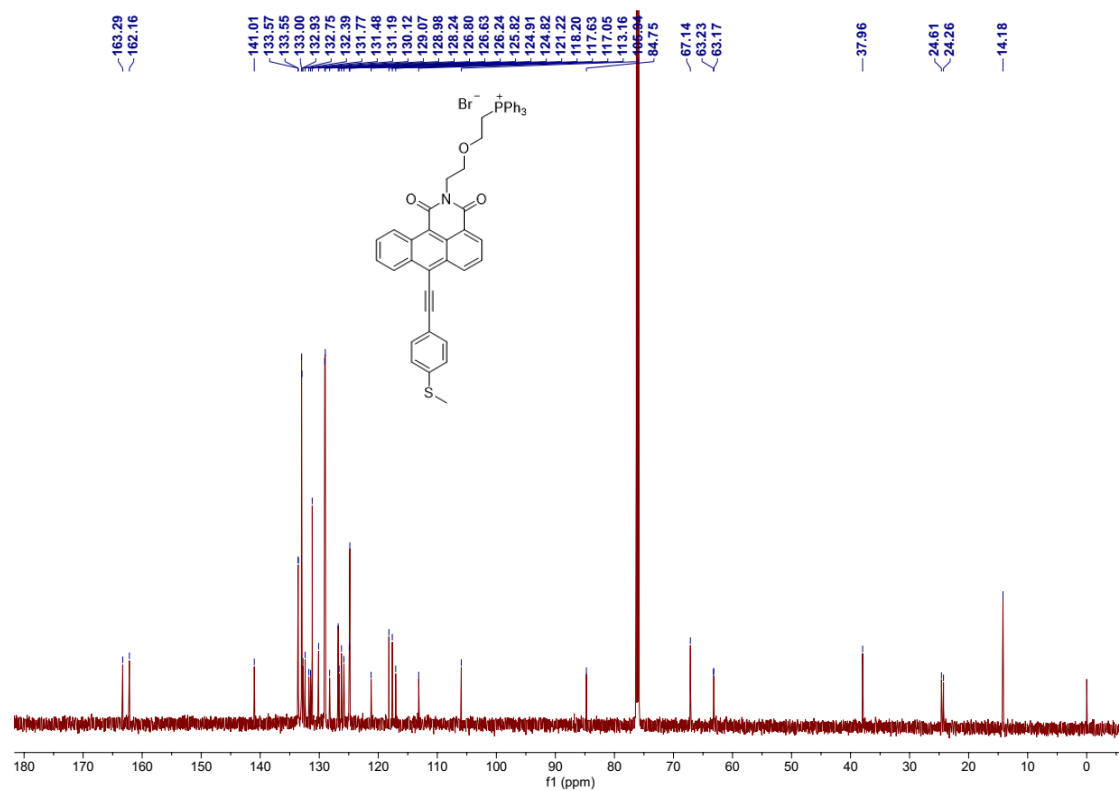

**Figure S15.** <sup>13</sup>C NMR (101 MHz) spectrum of **mito-ACS** in CDCl<sub>3</sub>.

1. Zhu, B.; Gao, C.; Zhao, Y.; Liu, C.; Li, Y.; Wei, Q.; Ma, Z.; Du, B.; Zhang, X., A 4-hydroxynaphthalimide-derived ratiometric fluorescent chemodosimeter for imaging palladium in living cells. *Chem. Commun.* **2011**, 47, (30), 8656-8658.
2. Zeng, L.; Xia, T.; Hu, W.; Chen, S.; Chi, S.; Lei, Y.; Liu, Z., Visualizing the Regulation of Hydroxyl Radical Level by Superoxide Dismutase via a Specific Molecular Probe. *Anal Chem* **2018**, 90, (2), 1317-1324.
3. Xu, J.; Niu, G.; Wei, X.; Lan, M.; Zeng, L.; Kinsella, J. M.; Sheng, R., A family of multi-color anthracene carboxyimides: Synthesis, spectroscopic properties, solvatochromic fluorescence and bio-imaging application. *Dyes Pig.* **2017**, 139, 166-173.
